# Supplementary material for: Protocol paper for the ‘Harnessing resources from the internet to maximise outcomes from GP consultations (HaRI)’ study: a mixed qualitative methods study
Source: PubMed Central journal article supplement (PMC6089307; doi:10.1136/bmjopen-2018-024188), 2018-08-10
Supplement: bmjopen-2018-024188.reviewer_comments.pdf [file bmjopen-2018-024188.reviewer_comments.pdf]

## PEER REVIEW HISTORY

BMJ Open publishes all reviews undertaken for accepted manuscripts. Reviewers are asked to complete a checklist review form (<http://bmjopen.bmj.com/site/about/resources/checklist.pdf>) and are provided with free text boxes to elaborate on their assessment. These free text comments are reproduced below.

## ARTICLE DETAILS

|                            |                                                                                                                                                            |
|----------------------------|------------------------------------------------------------------------------------------------------------------------------------------------------------|
| <b>TITLE (PROVISIONAL)</b> | Protocol paper for the 'Harnessing resources from the internet to maximise outcomes from GP consultations (HaRI)' study: A mixed qualitative-methods study |
| <b>AUTHORS</b>             | Seguin, Maureen; Hall, Laura; Atherton, Helen; Barnes, Rebecca; Leydon, Geraldine; Murray, Elizabeth; Pope, Catherine; Ziebland, Sue; Stevenson, Fiona     |

This article was not externally reviewed at BMJ Open. Protocols that have been independently assessed prior to submission to BMJ Open are usually fast-tracked to publication on the grounds that further substantial changes will not be possible. This independent assessment will usually be external, independent review for both a substantial grant award from a non-commercial or government funder and ethics approval.
